# Supplementary material for: Sequence-targeted nucleosome sliding in vivo by a hybrid Chd1 chromatin remodeler
Source: HighWire-hosted journal article supplement (doi:10.1101/gr.199919.115), 2016-03-18
Supplement: Supplemental_Data_File_1.xlsx [file Supplemental_Data_File_1.xlsx]

## Sheet: Variations of GGCGGC Sequence
WNGGCGGCWW		Red = cluster 1			This is the same order for all heat maps looking at variations of the GGC motif Figures 2, 3, and associated supplemental figures.
TNGGCGGCWA		Orange = cluster 2
TNGGCGGCNA		Yellow = cluster 3
GGCGGCNA
TNGGCGGC
GGGCGGC
GGCGGCT
GGCGGCA
WNAGCGGCWW
CGGCGGC
GGCGGC
ANGGCGGC
TGGCGGC
WNCGCGGCWW
CNGGCGGC
AGGCGGC
GGCGGCNG
AGCGGC
GGCGGCG
GGCGGCNC
GGCGGCNT
GNGGCGGC
GGCGGCC
CGCGGC
GGCGGT
GCCGGC
GGCGCC
WNGGCAGCWW
WNTGCGGCWW
GGCGTC
GTCGGC
GGCCGC
GGCNNNNNNNNNNGGC
GGCNGGC
GGCNNNGGC
GACGGC
GGGGGC
GGCNNGGC
GGCGGG
TGCGGC
GGCGAC
SGWGGMRRNANW
AAAAAAA
GGCTGC
GGCAGC
GGCGGA
GGTGGC
GGAGGC

## Sheet: GGC Motifs and other TFs - 2B
WNGGCGGCWW			Order of motifs for Figure 2B, Figure S1, Figure S3B
TNGGCGGCWA			Motifs are from JASPAR database: http://jaspar.genereg.net/
TNGGCGGCNA
GGCGGCNA
TNGGCGGC
GGGCGGC
GGCGGCT
GGCGGCA
WNAGCGGCWW
CGGCGGC
GGCGGC
ANGGCGGC
TGGCGGC
WNCGCGGCWW
CNGGCGGC
AGGCGGC
GGCGGCNG
AGCGGC
GGCGGCG
GGCGGCNC
GGCGGCNT
GNGGCGGC
GGCGGCC
YAP1
SNT2
YPR015C
GCN4
ZAP1
PDR3
THI2
IME1
TBS1
SUT2
YDR026C
USV1
IXR1
UGA3
RLM1
STP2
CAD1
YAP7
RSC3
PDR1
NHP10
SUT1
FKH1
TOD6
ACS
BAS1
RDS1
DOT6
ASH1
NRG1
MCM1
SWI6
RTG3
REI1
SKO1
NDT80
HAP4
ROX1
YAP6
RSC30
RPN4
TBP
SUT1
PDR8
LEU3
MAC1
GSM1
ABF1
TYE7
RME1
CBF1
MBP1
ZMS1
REB1
STP1
RAP1
TEA1
GAL4
SFP1
HAP3
YER130C
STP4
YRR1
OPI1
AFT1
YDR520C
HSF1
YRM1
MBP1_SWI6
CUP9
CEP3
OAF1
MET4
SWI5
YAP3
FHL1
CHA4
CRZ1
YBR239C
YJL103C
MET28
STB3
YPR196W
ECM22
FKH2
SWI4
NHP6B
ARG81
TEC1
RDS2
RPH1
YML081W
STB4
YER184C
NHP6A
CUP2
RDR1
YLR278C
HMRA2
SMP1
YGR067C
STP3
MIG1
CIN5
YKL222C
SFL1
YNR063W
MATA
YLL054C
AFT2
STE12
SPT2
FZF1
CST6
INO4
STB5
CAT8
MATALPHA2
YPR022C
MET32
GAT4
GIS1
ADR1
GCR1
GLN3
GAT1
HAC1
SRD1
GAT3
SUM1
RIM101
SPT23
TBF1
YOX1
YHP1
SIP4
MGA1
YPR013C
TOS8
STE12
LYS14
INO2
ECM23
RFX1
MET31
ARO80
AZF1
HAP2
RGM1
DAL80
ACE2
MSN24
PHD1
SKN7
HAP1
RGT1
SOK2
YAP5
EDS1
DAL82
XBP1
HAP5
ASG1
GZF3
ARG80
UPC2
MOT3
HAL9
GCR2
PUT3

## Sheet: GGC Motifs and other TFs - 3A
WNGGCGGCWW			Order of motifs for Figure 3A, Figure S5A
TNGGCGGCWA			Motifs are from JASPAR database: http://jaspar.genereg.net/
TNGGCGGCNA
GGCGGCNA
TNGGCGGC
GGGCGGC
GGCGGCT
GGCGGCA
WNAGCGGCWW
CGGCGGC
GGCGGC
ANGGCGGC
TGGCGGC
WNCGCGGCWW
CNGGCGGC
AGGCGGC
GGCGGCNG
AGCGGC
GGCGGCG
GGCGGCNC
GGCGGCNT
GNGGCGGC
GGCGGCC
SNT2
YAP1
PDR3
IME1
YDR026C
YPR015C
ZAP1
USV1
TBS1
SUT2
ACS
THI2
GCN4
MCM1
RSC3
ABF1
ASH1
RLM1
IXR1
SWI6
SUT1
STP2
YAP7
NHP10
MBP1
RTG3
PDR1
GSM1
TOD6
PDR8
BAS1
REB1
CAD1
NDT80
LEU3
MBP1_SWI6
RDS1
NRG1
OAF1
FKH1
ROX1
REI1
UGA3
RSC30
SKO1
YPR196W
YAP6
YRM1
HAP4
CBF1
YLR278C
RPN4
TYE7
YJL103C
DOT6
STP1
RME1
YNR063W
SUT1
MIG1
RAP1
OPI1
YRR1
SFP1
MET4
GAL4
HSF1
ADR1
AFT1
YDR520C
RDS2
SWI4
YGR067C
CHA4
CEP3
YML081W
MAC1
MET28
TEA1
YKL222C
FHL1
AFT2
MET32
YPR022C
SIP4
ECM22
STB4
STE12
YLL054C
ZMS1
YBR239C
TBP
TEC1
TBF1
STP4
CAT8
HAP1
STB3
MOT3
MET31
GCR1
YER130C
HAL9
RGT1
FKH2
YER184C
ARG81
RPH1
STE12
INO2
RDR1
RIM101
HAP3
STP3
CST6
CUP2
ARO80
MSN24
DAL82
CRZ1
FZF1
SRD1
INO4
GAT3
GIS1
PHD1
RFX1
YAP5
RGM1
HAP2
YOX1
GAT4
SWI5
MATA
STB5
ASG1
SPT23
TOS8
ARG80
CUP9
SOK2
YHP1
YAP3
SKN7
SUM1
SMP1
HAC1
AZF1
SPT2
CIN5
SFL1
XBP1
EDS1
ECM23
GCR2
HAP5
LYS14
MGA1
UPC2
DAL80
GZF3
YPR013C
HMRA2
ACE2
GLN3
GAT1
MATALPHA2
NHP6B
NHP6A
PUT3
