# Supplementary material for: Sequence-targeted nucleosome sliding in vivo by a hybrid Chd1 chromatin remodeler
Source: HighWire-hosted journal article supplement (doi:10.1101/gr.199919.115), 2016-03-18
Supplement: Supplemental_Data_File_2.xlsx [file Supplemental_Data_File_2.xlsx]

## Sheet: Motif_Proximal_Nucleosomes
This file provides nucleosome positions at each intergenic WNGGCGGCWW motif, nearby genomic features, and direction of remodeling with respect to each feature							Motif-Proximal Nucleosome Position(s)			1=toward TSS; 2=away from TSS
Motif ID	Chromosome	URS1 Position	Motif Dirctionality	Nearby Gene Feature	ume6	ume6+Chd1-Ume6	WT	WT+Chd1-Ume6	Notes:	WT	Fusion
1	chrI	45147	-	TSS, YAL054C (45076)	45159	45159/45185, 45376	45180, 45355	45185, 45376	remodeled away from TSS in WT; remodeled away from TSS with Chd1-Ume6	2	2
2	chrI	45244	+	TSS, YAL054C (45076)	45159	45159/45185, 45376	45180, 45355	45185, 45376	remodeled away from TSS in WT; remodeled away from TSS with Chd1-Ume6	2	2
3	chrI	70933	-	No Feature	70733	70733	70816	70816	remodeling in WT, (no feature)	(-)	(-)
4	chrI	141672	-	TSS, YAL005C (141495)	141568	141617	141568	141617	no remodeling in wild-type; remodeled away from TSS with Chd1-Ume6	0	2
5	chrI	227523	+	TSS, YAR073W	NA	NA	NA	NA	UNDEFINED (ambiguous genomic sequence)	(-)	(-)
6	chrII	7802	+	TSS, YBL108C-A	no signal	no signal	no signal	no signal	no local nucleosomes	(-)	(-)
7	chrII	29182	+	No Feature	29130, 29279	29130, 29279	29130, 29279	29130, 29279	no remodeling, no feature	(-)	(-)
8	chrII	62838	-	TSS, YBL086C (62629)	62929	62893	62915	62893	remodeled toward TSS in WT; remodeled toward TSS with Chd1-Ume6	1	1
9	chrII	101356	-	TSS, YBL064C (101189)	101321/101358, 101551	101321/101358, 101551	101321/101358, 101469/101510	101321/101358, 101469/101510	remodeled toward from TSS in WT; not remodeled with Chd1-Ume6	1	0
10	chrII	258340	+	TSS, YBR011C (257986)	258286/258332	258286/258332	258286/258332	258286/258332	no remodeling	0	0
11	chrII	278580	-	TSS, YBR019C (278400)	278473, 278631	278473/278550, 278631	278473, 278631	278473/278550, 278631	remodeled away from TSS with Chd1-Ume6, not remodeled in WT	0	2
12	chrII	366716	-	TSS, YBR062C (366608)	366581, 366757/366826	366581, 366757/366826	366581, 366757/366826	366581, 366757/366826	no remodeling	0	0
13	chrII	466624	-	TSS, YBR114W (467169)	466754	466673	466721	466673	remodeled away from TSS in WT; remodeled away from TSS with Chd1-Ume6	2	2
14	chrII	466898	-	TSS, YBR114W (467169)	466898	466872	466882	466872	remodeled away from TSS in WT; remodeled away from TSS with Chd1-Ume6	2	2
15	chrII	597266	+	TTS, YBR182W (597103), TSS, YBR184W (597383)	597391	597131, 597305/597391	597155, 597380	597131, 597315/597382	remodeled away from TTS/toward TSS with WT; remodeled away from TSS with Chd1-Ume6	1	2
16	chrII	600460	+	TSS, YBR186W (600557)	600592	600514/600602	600561	600529/600563	remodeled toward TSS in WT; remodeled toward TSS with Chd1-Ume6	1	1
17	chrII	604361	+	TSS, YBR188C (604171) ,TSS YBR189W (604477)	604112, 604525	604112, 604525	604112, 604525	604112, 604525	no remodeling	0	0
18	chrII	615039	-	TSS, YBR196C-A (614514)	614951	614990	614957	614990	no remodeling in WT; remodeled away from TSS with Chd1-Ume6	0	2
19	chrII	728278	+	TSS, YBR256C (728123)	728415	728326/728426, 728471	728377	728326/728471	remodeled toward TSS in WT; remodeled toward TSS with Chd1-Ume6	1	1
20	chrII	768057	+	TSS, YBR282W (768204)	767998	768012	767998	768012	remodeled toward TSS in WT; remodeled toward TSS with Chd1-Ume6	1	1
21	chrII	771110	+	TSS, YBR284W	771078	771078	771078	771078	no remodeling	0	0
22	chrII	808277	+	TTS, YBR300C	808246	808246	808246	808246	no remodeling	0	0
23	chrII	811573	-	TSS, YBR302C (811485)	811713	811713	811696	811625/811696	remodeled away from TSS in WT; no remodeling by Chd1-Ume6	2	0
24	chrIII	78582	-	TSS, YCL024W (78782)	78713	78644	78690	78644	Remodeled away from TSS in WT, remodeled away from TSS by Chd1-Ume6	2	2
25	chrIII	78613	-	TSS, YCL024W (78782)	78713	78644	78690	78644	Remodeled away from TSS in WT, remodeled away from TSS by Chd1-Ume6	2	2
26	chrIII	78626	-	TSS, YCL024W (78782)	78713	78644	78690	78644	Remodeled away from TSS in WT, remodeled away from TSS by Chd1-Ume6	2	2
27	chrIII	83354	+	TSS, YCL021W-A (83419)	83275, 83488	83291, delocalized	83275, 83460	83298, delocalized	Remodeled toward TSS in WT, remodeled toward TSS by Chd1-Ume6	1	1
28	chrIII	133365	-	TSS, YCR010C (133277)	133242, 133406/133466	133242/133323, 133406/133466	133261, 133466	133242/133333, 133410/133475	remodeled toward/toward TSS in WT, remodeled toward/toward TSS by Chd1-Ume6	1	1
29	chrIII	133448	-	TSS, YCR010C (133277)	133242, 133406/133466	133242/133323, 133406/133466	133261, 133466	133242/133333, 133410/133475	Overlap with another URS1, occluded by nucleosomes in all cases	0	0
30	chrIII	197205	-	TSS, YCR037C (197220)	197187	197187	197111	197170	Remodeled away from TSS in WT, not remodeled by Chd1-Ume6	1	0
31	chrIII	225315	-	TSS, YCR061W (225505)	225126, 225355	225126, 225355	225191, 225355	225191/225269, 225355	Remodeled toward TSS in WT, not remodeled by Chd1-Ume6	1	0
32	chrIII	303147	+	TSS, YCR101C (303082)	302978, 303305	302978, 303305	303213	303213	Remodeled toward TSS in WT, not remodeled by Chd1-Ume6	1	0
33	chrIV	1712	+	TSS, YDL248W (ambiguous start)	NA	NA	NA	NA	UNDEFINED (ambiguous genomic sequence)	(-)	(-)
34	chrIV	28889	+	TSS, YDL239C (28795)	28782, 29020	28758/28854, 29020/28954	28822, 29000	28854, 28952/29000	Remodeled away from TSS in WT, remodeled away from TSS by Chd1-Ume6	2	2
35	chrIV	74133	-	TSS, YDL215C (74131)	74097	74097	74097	74097	no remodeling	0	0
36	chrIV	114439	-	TSS, YDL193W (114610)	114322	114395	114341	114395	Remodeled toward TSS in WT, remodeled toward TSS by Chd1-Ume6	1	1
37	chrIV	132414	-	no feature	132344	132361	132344	132361	remodeling by Chd1-Ume6 (no feature)	(-)	(-)
38	chrIV	359004	-	no feature	359072 (delocalized)	359072 (delocalized)	359072 (delocalized)	359072 (delocalized)	no remodeling, no feature	(-)	(-)
39	chrIV	437015	-	TSS, YDL007C-A (undefined start)	437065	437065	437065	437065	no remodeling	0	0
40	chrIV	477731	-	TSS, YDR014W-A (477780)	477553/477636, 477830	477553/477636, 477785/477839	477636, 477830	477553/477636, 477785	Remodeled toward TSS in WT, remodeled toward TSS by Chd1-Ume6	1	1
41	chrIV	562997	+	no feature	563019 (delocalized)	563019 (delocalized)	563019 (delocalized)	563019 (delocalized)	no remodeling, no feature	(-)	(-)
42	chrIV	806349	+	TSS, YDR171W (806544)	806240, 806524	806240, 806408/806530	806240, 806488	806240, 806410	Remodeled away TSS in WT, remodeled away from TSS by Chd1-Ume6	2	2
43	chrIV	821286	+	TSS, YDR180W (821306)	821194, 821376	821194, 821350	821194, 821376	821194, 821350	Remodeled toward TSS in WT, remodeled toward TSS by Chd1-Ume6	1	1
44	chrIV	889228	+	no feature	889276	889276	889276	889276	no remodeling, no feature	(-)	(-)
45	chrIV	909976	-	TSS, YDR222W (909983)	~909897, ~910088 (delocalized)	~909897/910121, ~910088 (delocalized)	~909897, ~910060 (delocalized)	~909897, ~910023 (delocalized)	Remodeled toward TSS in WT, remodeled toward TSS by Chd1-Ume6	1	1
46	chrIV	1032418	+	TSS, YDR285W (1032455)	1032330, 1032521	1032348, 1032521/1032483	1032330, 1032508	1032346, 1032489	Remodeled toward TSS in WT, remodeled toward TSS by Chd1-Ume6	1	1
47	chrIV	1224620	-	TSS, YDR274C (1224495)	1224477	1224477/1224561	1224514	1224566	Remodeled away from TSS in WT, remodeled away from TSS by Chd1-Ume6	2	2
48	chrIV	1258457	-	TSS, YDR392W (1258572)	1258431	1258431	1258431	1258431	no remodeling	0	0
49	chrIV	1469155	-	TSS, YDR510W (1469331)	1469104	1469104	1469104	1469104	no remodeling	0	0
50	chrV	14710	+	TTS, YEL072W (14625)	14610, 14787 (delocalized)	14610, 14787 (delocalized)	14610, 14787 (delocalized)	14610, 14787 (delocalized)	no remodeling, no TSS	(-)	(-)
51	chrV	46451	+	no feature	46414/46483, 46567 (delocalized)	46414/46483, 46567 (delocalized)	46414/46483, 46567 (delocalized)	46414/46483, 46567 (delocalized)	no remodeling, no feature	(-)	(-)
52	chrV	53607	+	TSS, YEL054C (53278)	53607	53607	53607	53607	no remodeling	0	0
53	chrV	106780	+	TSS, YEL024W (107083)	106694, 106874	106671, 106842/106874	106710, 106874	106671/106710, 106842/106874	Not remodeled in WT, remodeled away from TSS by Chd1-Ume6	0	2
54	chrV	106864	-	TSS, YEL024W (107083)	106694, 106874	106671, 106842/106874	106710, 106874	106671/106710, 106842/106874	Overlap with another URS1, occluded by nucleosomes in all cases	0	0
55	chrV	239867	-	TSS, YER044C-A (239759), TTS, YER045C (239916)	239742, 240009	239816, 239991	239771, 239961	239816, 239972	Remodeled toward TSS (toward from TTS) in WT, remodeled toward TSS (toward TTS) by Chd1-Ume6	1	1
56	chrV	264418	-	no feature	264254, 264512	264254, 264447/264512	264254, 264512	264254, 264447/264512	remodeling by Chd1-Ume6 (no feature)	(-)	(-)
57	chrV	386424	-	no feature	386500	386482	386500	386482	remodeling by Chd1-Ume6 (no feature)	(-)	(-)
58	chrV	386955	-	TSS, YER112W (387149)	386804	386910	386853	386910	Remodeled toward TSS in WT, remodeled toward TSS by Chd1-Ume6	1	1
59	chrV	548285	-	TSS, YER179W (548415)	548114/548181, 548383	548114/548181, 548341/548383	548181, 548361	548114/548181, 548341	Remodeled away from TSS in WT, remodeled away from TSS by Chd1-Ume6	2	2
60	chrVI	6337	+	TSS, YFL062W (~6430)	6197, 6491	6197/6289, 6491	6236, 6464	6289, 6464	Remodeled toward TSS in WT, remodeled toward TSS by Chd1-Ume6	1	1
61	chrVI	182133	-	TTS, YFR017C (182226)	181959, 182267	181959, 182267	182010, 182243	182010, 182177/182243	Remodeled toward TTS in WT, not remodeled by Chd1-Ume6	(-)	(-)
62	chrVII	75026	+	no feature	74958, 75102 (delocalized)	74958, 75102 (delocalized)	74958, 75102 (delocalized)	74958, 75102 (delocalized)	no remodeling, no feature	(-)	(-)
63	chrVII	76575	-	TSS, YGL225W (76852)	76465	76465/76526	76465	76465/76526	not remodeled in WT, remodeled toward TSS by Chd1-Ume6	0	1
64	chrVII	156460	+	TTS, YGL183C (156180)	156651 (delocalized)	156511/156651	156558	156511	remodeled toward TTS in WT, remodeled toward TTS by Chd1-Ume6	(-)	(-)
65	chrVII	191088	+	TSS, YGL166W (191107)	191145	191145	191145	191145	no remodeling	0	0
66	chrVII	310286	-	TSS, YGL104C (310329)	310165, 310381	310165/310220, 310381	310165, 310381	310165/310220, 310381	Not remodeled in WT, remodeled away from TSS by Chd1-Ume6	0	2
67	chrVII	321565	+	TSS, YGL097W (321724)	321429, 321786	321429, 321786	321474, 321786	321474/321496, 321786	Remodeled toward TSS in WT, not remodeled by Chd1-Ume6	1	0
68	chrVII	421883	-	no feature	421858, 422099	421858, 422099	421858, 422099	421858, 422099	no remodeling, no feature	(-)	(-)
69	chrVII	434552	+	no feature	434513, 434686	434513, 434686	434513, 434686	434513, 434686	no remodeling, no feature	(-)	(-)
70	chrVII	435498	+	TSS, YGL033W (~435603)	435415, 435659	435444, 435659	435432, 435603	435432, 435603/435659	Remodeled toward TSS in WT, remodeled toward TSS by Chd1-Ume6	1	1
71	chrVII	712645	+	TTS, YGR109W-B (~712537)	712666	712666	712666	712666	no remodeling	(-)	(-)
72	chrVII	754478	+	TSS, YGR131W (754681)	754360, 754589	754360, 754517/754589	754360, 754589	754360, 754517/754589	Not remodeled in WT, remodeled away from TSS by Chd1-Ume6	0	2
73	chrVII	766564	+	no feature	766374, 766760 (delocalized)	766374, 766760 (delocalized)	766374, 766659	766374, 766635	remodeled in WT, not remodeled by Chd1-Ume6, no feature	(-)	(-)
74	chrVII	808186	+	no feature	808062, 808217	808062, 808217	808062, 808217	808062, 808217	no remodeling, no feature	(-)	(-)
75	chrVII	994731	-	no feature	994690, 994863	994690, 994863	994690, 994863	994690, 994863	no remodeling, no feature	(-)	(-)
76	chrVII	1022093	+	TSS, YGR264C (1021906)	1021997, 1022175	1021997, 1022144	1021997, 1022175	(-), 1022144	not remodeled in WT, remodeled toward TSS by Chd1-Ume6	0	1
77	chrVII	1079525	+	no feature	1079498 (delocalized), 1079688	1079498 (delocalized), 1079688	1079498 (delocalized), 1079688	1079498 (delocalized), 1079688	no remodeling, no feature	(-)	(-)
78	chrVIII	25665	+	TTS, YHL037C	25507, 25777	25507, 25722	25507, 25770	25507, 25722	Remodeled toward TTS in WT, remodeled toward TTS by Chd1-Ume6	(-)	(-)
79	chrVIII	55860	+	TTS, YHL025W (55935)	55813 (diffuse), 55997 (diffuse)	55813 (diffuse), 55997 (diffuse)	55813 (diffuse), 55997 (diffuse)	55813 (diffuse), 55997 (diffuse)	no remodeling	(-)	(-)
80	chrVIII	56310	-	TSS, YHL024W (56508)	56217 (diffuse), 56394	56217 (diffuse), 56370	56217 (diffuse), 56394	56217 (diffuse), 56370	no remodeling in WT, remodeled away from TSS by Chd1-Ume6	0	2
81	chrVIII	117091	+	Ty1 LTR, YHRCdelta4	116964, 117248	116964, 117146/117248	116978, 117184	116978, 117146	remodeling toward Ty1 in WT, toward Ty1 by Chd1-Ume6	1	1
82	chrVIII	131954	-	TSS, YHR014W (132010)	131861, 132056	131861/131904, 132056	131861, 132036	131861/131904, 132056	Remodeled toward TSS in WT, remodeled toward TSS by Chd1-Ume6	1	1
83	chrVIII	262659	-	TSS, YHR079C-A (262570)	262532, 262836	262532/262612, 262836	262562, 262836	262612, 262836	Remodeled toward TSS in WT, remodeled toward TSS by Chd1-Ume6	1	1
84	chrVIII	282458	+	TTS, YHR088W (282477)	282458	282458	282458	282458	Nucleosome on top of site; no remodeling	(-)	(-)
85	chrVIII	375479	-	TSS, YHR137W (375480)	375261, 375694	375261, 375694	375261, 375694	375261, 375694	no remodeling	0	0
86	chrVIII	402767	-	TSS, YHR153C (402648)	402648, 402976	402648/402720, 402976	402671, 402976	402720, 402976	Remodeled away from TSS in WT, remodeled away from TSS by Chd1-Ume6	2	2
87	chrVIII	412818	+	TSS, YHR157W (412833)	412697, 412950	412773, 412950	412762, 412934	412773, 412934/412950	Remodeled toward TSS in WT, remodeled toward TSS by Chd1-Ume6	1	1
88	chrVIII	502282	-	TSS, YHR202W (502378)	502154, 502420	502154, 502420	502178, 502420	502217, 502420	Remodeled toward TSS in WT, not remodeled by Chd1-Ume6	1	0
89	chrVIII	524180	-	no feature	524076, 524227	524076, 524227	524076, 524227	524076, 524227	no remodeling, no feature	(-)	(-)
90	chrIX	226075	-	TSS, YIL073C (225887)	225964, 226252	225964, 226252	225972, 226144, 226300	225964, 226252/226300	extra nucleosome placed in WT, no remodeling by Chd1-Ume6	(-)	0
91	chrIX	226433	+	TSS, YIL072W (226597)	226252, 226533	226252, 226481	226300, 226533	226252/226300, 226481	Remodeled toward TSS in WT, remodeled away from TSS by Chd1-Ume6	1	2
92	chrIX	277510	-	TTS, YIL041W (277592)	277510 (diffuse)	277510 (diffuse)	277510 (diffuse)	277510 (diffuse)	Nucleosome on top of site; no remodeling	(-)	(-)
93	chrIX	430142	+	TTS, YIR039C (430366)	430039, 430250	430039, 430192/430250	430039, 430223	430039, 430192	Remodeled away from TTS in WT, remodeled away from TTS by Chd1-Ume6	(-)	(-)
94	chrIX	438264	-	TSS, YIR043C (437730)	438133, 438397	438133, 438314/438397	438133, 438397	438133, 438314/438397	no remodeling in WT, remodeled toward TSS by Chd1-Ume6	0	1
95	chrX	136076	-	TSS, YJL153C (135950)	135855, 136058 (diffuse)	135855, 136058 (diffuse)	135920, 136076	135855/135920, 136076	Remodeled toward TSS in WT; not remodeled by Chd1-Ume6 (second URS1 upstream)	1	0
96	chrX	189664	+	TSS, YJL122W (189697)	189745	189723/189745	189745	189723/189745	no remodeling in WT, remodeled toward TSS by Chd1-Ume6	0	1
97	chrX	220842	+	TSS, YJL106W (221291)	220671 (diffuse), 220978	220671 (diffuse), 220904/220978	220671 (diffuse), 220923	220671 (diffuse), 220904	Remodeled away from TSS in WT, remodeled away from TSS by Chd1-Ume6	2	2
98	chrX	220937	+	TSS, YJL106W (221291)	220671 (diffuse), 220978	220671 (diffuse), 220904/220978	220671 (diffuse), 220923	220671 (diffuse), 220904	Remodeled away from TSS in WT, remodeled away from TSS by Chd1-Ume6 (overlap with above site)	2	2
99	chrX	223569	+	TTS, YJL106W (223542)	223475, 226763	223475, 226763	223500, 226763	223500, 226763	Remodeled toward TTS in WT, not remodeled by Chd1-Ume6	(-)	(-)
100	chrX	236553	-	TSS, YJL101C (236509)	236495	236495	236495	236495	no remodeling in WT, no remodeling by Chd1-Ume6	0	0
101	chrX	265671	+	TSS, YJL089W (265912)	265420/265498, 265795	265420/265498, 265756/265795	265498, 265795	265498, 265756/265795	Remodeled toward TSS in WT, remodeled away from TSS by Chd1-Ume6	1	2
102	chrX	265705	+	TSS, YJL089W (265912)	265420/265498, 265795	265420/265498, 265756/265795	265498, 265795	265498, 265756/265795	Remodeled toward TSS in WT, remodeled away from TSS by Chd1-Ume6	1	2
103	chrX	415871	+	TTS, tW(CCA)J (415934)	415734	415734/415816	415777	415816	remodeled toward TTS in WT, remodeled toward TTS by Chd1-Ume6	(-)	(-)
104	chrX	434925	-	TSS, YJL002C (434692), TSS, YJL001W (435122)	434911	434911	434911	434911	no remodeling, nucleosome on site	0	0
105	chrX	449049	-	TSS, YJR006W (449197), TSS, YJR005C-A (448957)	448924, 449233	448998, 449233	448955, 449233	448998, 449233	Remodeled toward/away from TSS in WT, remodeled toward/away from TSS by Chd1-Ume6	1,2	1,2
106	chrX	607960	-	TSS, YJR094W-A (608266)	607835, 608159	607821/607919, 608159	607868, 608159	607919, 608159	Remodeled toward TSS in WT, remodeled toward TSS by Chd1-Ume6	1	1
107	chrX	620742	+	TSS, YJR103W (620651)	620582, 620789	620582, 620789	620582, 620789	620582, 620789	no remodeling	0	0
108	chrX	639888	-	TSS, YJR115W (639938)	639888	639888	639888	639888	no remodeling, nucleosome on site	0	0
109	chrX	663469	+	TSS, snR3 (663732)	663469	663469	663469	663469	no remodeling, nucleosome on site	0	0
110	chrX	744093	-	TSS, YJR161C (743997)	743948, 744232	743948, 744232	743948, 744232	743948, 744153/744232	no remodeling	0	0
111	chrXI	14460	+	TSS, YKL219W (14522)	14341, 14585	14341, 14520/14585	14341, 14585	14341, 14520/14585	no remodeling in WT, remodeled toward TSS by Chd1-Ume6	0	1
112	chrXI	21456	+	no feature	21373, 21559	21398, 21559	21373, 21559	21398, 21559	not remodeled in WT, remodeled by Chd1-Ume6, no feature	(-)	(-)
113	chrXI	82750	-	TTS, YKL191W (82722)	82621	82691	82650	82691	Remodeled toward TTS in WT, remodeled toward TTS by Chd1-Ume6	(-)	(-)
114	chrXI	99974	-	TSS, YKL182W (100350)	99944, 100176	99944, 100176	99944, 100176	99944, 100176	no remodeling, nucleosome on site	0	0
115	chrXI	137271	-	no feature	137261, 137427	137261, 137427	137261, 137427	137261, 137427	no remodeling, nucleosome on site, no feature	(-)	(-)
116	chrXI	288708	+	TTS, YKL079W (288643)	288568	288568/288659	288596	288596/288659	Remodeled toward TTS in WT, remodeled toward TTS by Chd1-Ume6	(-)	(-)
117	chrXI	408427	+	TSS, YKL015W (408444)	408492	408421/408492	408492	408421/408492	no remodeling in WT, remodeled toward TSS by Chd1-Ume6 (upstream URS1-like sequence present)	0	1
118	chrXI	450259	-	TSS, YKR005C (450200)	450164, 450403	450164/450224, 450403	450164, 450403	450224, 450403	no remodeling in WT, remodeled toward TSS by Chd1-Ume6	0	1
119	chrXI	619081	+	TSS, YKR094C (618768)	618969, 619121	618969, 619121	618969, 619121	618969, 619121	no remodeling in WT, no remodeling by Chd1-Ume6	0	0
120	chrXI	658260	+	no feature	658132, 658342	658132, 658318	658132, 658342	658132, 658318	no remodeling in WT, remodeling by Chd1-Ume6, no feature	(-)	(-)
121	chrXII	47636	+	TSS, YLL046C (47514)	47533	47533/47591	47533	47533/47591	No remodeling in WT, remodeled away from TSS by Chd1-Ume6	0	2
122	chrXII	65529	+	TSS, YLL039C (65306)	65499 (diffuse), 65674 (diffuse)	65499 (diffuse), 65570	65499 (diffuse), 65624	65577	Remodeled toward TSS in WT, remodeled toward TSS by Chd1-Ume6	1	1
123	chrXII	80782	+	TSS, YLL030C (81014)	80700, 80867	80716, 80867/80910	80700, 80867	80716, 80867/80910	No remodeling in WT, remodeled toward TSS by Chd1-Ume6	0	1
124	chrXII	108579	+	TTS, YLL018C-A (108598)	108530, 108700 (diffuse)	108530, 108643	108530, 108670	108530, 108643/108670	Remodeled toward TTS in WT, remodeled toward TTS by Chd1-Ume6	(-)	(-)
125	chrXII	193547	-	TSS, YLR024C (193315)	193443, 193698	193510, 193698	193443, 193672	193510, 193672	Remodeled toward TSS in WT, remodeled away from TSS by Chd1-Ume6	1	2
126	chrXII	203064	+	TSS, YLR030W (203266)	202993, 203157	203006, 203130/203157	202993, 203157	203006, 203130/203157	No remodeling in WT, remodeled toward, away from TSS by Chd1-Ume6	0	1,2
127	chrXII	407263	+	TTS, YLR132C (402270)	407373	407294/407373	407354	407294/407354	Remodeled toward TTS in WT, remodeled toward TTS by Chd1-Ume6	(-)	(-)
128	chrXII	665248	+	TSS, YLR259C (665038), TSS, YLR260W (665779)	665352	665318	665338	665318	Remodeled toward/away from TSS in WT, remodeled toward/away from TSS by Chd1-Ume6	1,2	1,2
129	chrXII	691315	-	TSS, YLR273C (691239), TSS, YLR274W (691526)	691285	691285	691285	691285	no remodeling, nucleosome on site	(-)	(-)
130	chrXII	764362	-	TSS, YLR314C (764208), TSS, YLR315W (764781)	764534	764404/764534	764404/764482/764534	764404/764534	Remodeled toward/away from TSS in WT, remodeled toward/away from TSS by Chd1-Ume6	1,2	1,2
131	chrXII	789857	-	TTS, YLR330W (789825)	789705	789705	789752	789752/789812	Remodeled toward TTS in WT, not remodeled by Chd1-Ume6	(-)	(-)
132	chrXII	1032162	-	TTS, YLR449W (1032102)	1031994, 1032262	1031994, 1032216	1032010/1032046, 1032229	1023010/1032046, 1032216	Remodeled toward TTS in WT, remodeled toward TTS by Chd1-Ume6	(-)	(-)
133	chrXIII	7149	+	TSS, YML132W (7246)	7017, 7304	7017/7094, 7304	7017, 7283	7017/7094, 7283	Remodeled toward TSS in WT, remodeled toward TSS by Chd1-Ume6	1	1
134	chrXIII	46097	+	TTS, YML112W (46018)	45921, 46142 (diffuse)	45921, 46142 (diffuse)	45921, 46142 (diffuse)	45921, 46142 (diffuse)	no remodeling in WT, no remodeling by Chd1-Ume6	0	0
135	chrXIII	91695	-	TSS, YML098C (91586)	91543/91599, 91757	91543/91599/91638, 91757	91599, 91757	91599/91638, 91757	Remodeled toward TSS in WT, remodeled toward TSS by Chd1-Ume6	1	1
136	chrXIII	119897	-	TTS, YML074C (120005)	119834	119834	119834	119834	no remodeling in WT, no remodeling by Chd1-Ume6	(-)	(-)
137	chrXIII	132352	+	no feature	132352	132352	132352	132352	no remodeling, no feature, nucleosome on site	(-)	(-)
138	chrXIII	142121	+	TSS, YML064W (145938)	142174	142174	142174	142174	no remodeling in WT, no remodeling by Chd1-Ume6	0	0
139	chrXIII	192484	-	TSS, YML042W (192786)	192345, 192663	192345/192429, 192663	192376, 192605	192376/192429, 192553/192605	Remodeled toward/away from TSS in WT, remodeled toward TSS by Chd1-Ume6	1,2	1
140	chrXIII	309911	-	TSS, YMR018W (310233)	309783, 310062	309783/309859, 310062	309811, 309062	309811/309872, 309062	Remodeled toward TSS in WT, remodeled toward TSS by Chd1-Ume6	1	1
141	chrXIII	420270	+	TSS, YMR076C (420017)	420081, 420362	420081, 420362	420081, 420362	420081, 420362	no remodeling in WT, no remodeling by Chd1-Ume6	0	0
142	chrXIII	436265	-	TSS, YMR084W (436579)	436383, 436111	436383, 436111	436383, 436111	436383, 436111	no remodeling in WT, no remodeling by Chd1-Ume6	0	0
143	chrXIII	465448	-	TSS, YMR099C (464851)	465305, 465553	465279/465387, 465553	465231, 465378, 465553	465255/465387, 465553	extra nucleosome placed in WT, remodeling toward TSS in WT, remodeled toward/away from TSS by Chd1-Ume6	1	1,2
144	chrXIII	469617	-	TSS, YMR101C (469509)	469483, 469673	469571 (diffuse), 469673/469722	469532, 469703	469578, 469673/469722	Remodeled toward TSS in WT, remodeled toward TSS by Chd1-Ume6	1	1
145	chrXIII	536117	+	TSS, YMR133W (536181)	536060, 536238	536060, 536238	536060, 536238	536060, 536238	no remodeling in WT, no remodeling by Chd1-Ume6	0	0
146	chrXIII	632090	-	TSS, YMR186W (632332)	631951, 632157 (diffuse)	631951/632063	631987, 632157 (diffuse)	631987/632063	Remodeled toward TSS in WT, remodeled toward TSS by Chd1-Ume6	1	1
147	chrXIII	659571	+	TSS, YMR198W (659687)	659508, 659679	659508, 659679	659508, 659679	659508, 659679	no remodeling in WT, no remodeling by Chd1-Ume6	0	0
148	chrXIII	713787	+	TTS, YMR220W, TTS, YMR221C	713692	713797 (diffuse)	713692	713797	no remodeling in WT, remodeled toward/away from TTS by Chd1-Ume6	(-)	(-)
149	chrXIII	831618	+	TSS, YMR281W (832223)	831786	831672, 831816	831715, 831864	831672, 831816	Remodeled away from TSS, extra nucleosome in WT, remodeled away from TSS, extra nucleosome by Chd1-Ume6	2	2
150	chrXIII	852110	-	TSS, YMR290C (851613)	851950	851950/852092	851988	851988/852092	Remodeled away from TSS in WT, remodeled away from TSS by Chd1-Ume6	2	2
151	chrXIV	8235	+	TSS, YNL336W (8332)	8099, 8376/8392	8099/8188, 8376/8392	8099, 8368	8099/8188, 8368	no remodeling in WT, remodeled toward TSS by Chd1-Ume6	0	1
152	chrXIV	135798	+	TTS, YNL270C (135920)	135922	135858/135922	135908	135858/135908	Remodeled away from TTS in WT, remodeled away from TTS by Chd1-Ume6	(-)	(-)
153	chrXIV	174805	-	TSS, YNL251C (174573), YNL250W (175421)	174700, 174933	174700, 174933	174700, 174933	174700, 174933	no remodeling in WT, no remodeling by Chd1-Ume6	0	0
154	chrXIV	271303	+	TSS, YNL196C (271171)	271185, 271403	271185/271245, 271356	271214, 271391	271245, 271356/271391	Remodeled away from TSS in WT, remodeled away from TSS by Chd1-Ume6	2	2
155	chrXIV	348868	-	TSS, YNL151C (348570)	348779, 348956	348797, 348956	348779, 348956	348797, 348956	no remodeling in WT, remodeled away from TSS by Chd1-Ume6	0	2
156	chrXIV	755152	+	TSS, YNR066C (755078)	754992, 755242	754992, 755242	754992, 755242	754992, 755242	no remodeling in WT, no remodeling by Chd1-Ume6	0	0
157	chrXIV	772396	+	TSS, YNR072W	no signal	no signal	no signal	no signal	no data; ambiguous sequence	(-)	(-)
158	chrXV	72945	-	TSS, YOL131W (73027)	72833, 73064	72833, 72995/73064	72833, 73032	72833, 72995/73032	Remodeled toward TSS in WT, remodeled toward TSS by Chd1-Ume6	1	1
159	chrXV	83270	+	TSS, YOL126C (83090)	83228 (diffuse), 83323	83228 (diffuse), 83323	83228 (diffuse), 83323	83228 (diffuse), 83323	no remodeling in WT, no remodeling by Chd1-Ume6	0	0
160	chrXV	87264	+	TSS, YOL124C (86790)	87178	87214	87178	87214	no remodeling in WT, remodeled away from TSS by Chd1-Ume6	0	2
161	chrXV	111914	-	TSS, YOL108C (111918)	111855, 112113	111855, 112113	111855, 112113	111855, 112113	no remodeling in WT, no remodeling by Chd1-Ume6	0	0
162	chrXV	117539	-	TSS, YOL104C (117678)	117416, 117673	117416/117502, 117673	117436, 117673	117436/117502, 117673	Remodeled toward TSS in WT, remodeled toward TSS by Chd1-Ume6	1	1
163	chrXV	128803	-	TSS, YOL100W (129029)	128726, 128986	128752, 128986	128726, 128986	128752, 128986	no remodeling in WT, remodeled toward TSS by Chd1-Ume6	0	1
164	chrXV	143860	-	TTS, YOL093W (143803)	143773, 143928	143773/143823, 143928	143773, 143928	143773/143823, 143928	no remodeling in WT, remodeled toward TTS by Chd1-Ume6	(-)	(-)
165	chrXV	168208	-	TSS, YOL382W (168425)	168073 (diffuse), 168374	168073 (diffuse), 168374	168073 (diffuse), 168374	168073 (diffuse), 168374	no remodeling in WT, no remodeling by Chd1-Ume6	0	0
166	chrXV	232439	+	TTS, YOL052C (232339)	232439	232439	232439	232439	no remodeling, nucleosome on site	(-)	(-)
167	chrXV	281890	+	TSS, YOL022C (281516)	281854, 282025	281854, 282025	281854, 282025	281854, 282025	no remodeling in WT, no remodeling by Chd1-Ume6	0	0
168	chrXV	331314	+	TSS, YOR003W (331277)	331265, 331424	331265, 331424	331265, 331424	331265, 331424	no remodeling in WT, no remodeling by Chd1-Ume6	0	0
169	chrXV	340235	-	TSS, YOR007C (340018)	340174, 340367	340211, 340367	340174, 340367	340211, 340367	no remodeling in WT, remodeled away from TSS by Chd1-Ume6	0	2
170	chrXV	347723	+	no feature	348746, 348879	348746, 348879	348746, 348879	348746, 348879	no remodeling, no feature	(-)	(-)
171	chrXV	371061	+	TSS, YOR020C (370868)	370857, 371176	370857, 371124	370857, 371150	370857, 371124	Remodeled toward TSS in WT, remodeled toward TSS by Chd1-Ume6	1	1
172	chrXV	514552	-	TSS, YOR100C (514300)	514372, 514685	514372, 514630	514416, 514659	514416, 514630	Remodeled away from/toward TSS in WT, remodeled toward TSS by Chd1-Ume6	1,2	1
173	chrXV	546361	-	TTS, YOR117W (546470)	546261, 546421	546236/546261, 546421	546261, 546421	546236/546261, 546421	no remodeling in WT, remodeled away from TTS by Chd1-Ume6	(-)	(-)
174	chrXV	619264	-	no feature	619226, 619318	619226, 619318	619226, 619318	619226, 619318	no remodeling, no feature	(-)	(-)
175	chrXV	667363	+	TSS, YOR177C (667226)	667227, 667451 (diffuse)	667227, 667419	667248, 667432	667248, 667419	Remodeled away from/toward TSS in WT, remodeled toward TSS by Chd1-Ume6	1,2	1
176	chrXV	797059	+	TSS, YOR246C (796858)	797156	797156	797156	797156	no remodeling in WT, no remodeling by Chd1-Ume6	0	0
177	chrXV	901468	-	TTS, YOR313C (undefined)	901402 (diffuse), 901547 (diffuse)	901402 (diffuse), 901547 (diffuse)	901402 (diffuse), 901547 (diffuse)	901402 (diffuse), 901547 (diffuse)	no reomdeling in WT, no remodeling by Chd1-Ume6	(-)	(-)
178	chrXV	915387	+	TSS, YOR320C (915187)	915514	915427	915476	915427	Remodeled toward TSS in WT, remodeled toward TSS by Chd1-Ume6	1	1
179	chrXV	956657	+	TTS, YOR337W (956643)	956535	956535	956555	956555/956617	Remodeled toward TTS in WT, not remodeled by Chd1-Ume6	(-)	(-)
180	chrXV	996642	-	TSS, YOR351C (996533)	996568, 996736	996568/996631, 996736	996577, 996736	996577/996631, 996736	Remodeled away from TSS in WT, remodeled away from TSS by Chd1-Ume6	2	2
181	chrXV	996656	-	TSS, YOR351C (996533)	996568, 996736	996568/996631, 996736	996577, 996736	996577/996631, 996736	Remodeled away from TSS in WT, remodeled away from TSS by Chd1-Ume6	2	2
182	chrXV	1003668	+	TSS, YOR354C (1003233)	1003523, 1003790	1003523/1003657, 1003790	1003493/1003571, 1003790	1003493/1003571/1003657	Remodeled away from TSS in WT, remodeled away from TSS by Chd1-Ume6	2	2
183	chrXV	1071075	+	no feature	1070867, 1071157	1070867, 1071129	1070867, 1071143	1070867, 1071129	remodeled in WT and by Chd1-Ume6, no feature	(-)	(-)
184	chrXV	1076708	-	TSS, YOR390W (1076773)	1076484, 1076776	1076484, 1076776	1076484, 1076776	1076484, 1076776	no remodeling in WT, no remodeling by Chd1-Ume6	0	0
185	chrXVI	14430	+	TSS, YPL279C (14389)	14370, 14658	14370, 14658	14370, 14658	14370, 14658	no remodeling in WT, no remodeling by Chd1-Ume6	0	0
186	chrXVI	171290	-	TSS, YPL201C (171140)	171166, 171442	171166/171237, 171422	171223, 171399	171237, 171442	Remodeled away from/toward TSS in WT, remodeled away from TSS by Chd1-Ume6	1,2	2
187	chrXVI	246586	+	TSS, YPL161C (246242)	246504, 246661	246504/246542, 206628/206661	246504, 246661	246504/246542, 206628/206661	no remodeling in WT, remodeled toward/away from TTS by Chd1-Ume6	0	1,2
188	chrXVI	264828	-	TSS, YPL152W (264993)	264736, 265013	264761, 265013	264736, 265013	264761, 265013	no remodeling in WT, remodeled toward TSS by Chd1-Ume6	0	1
189	chrXVI	321753	+	TSS, YPL121C (321666)	321638, 321892	321638, 321818/321892	321675, 321846	321643, 321818	Remodeled toward TSS in WT, remodeled toward TSS by Chd1-Ume6	1	1
190	chrXVI	339791	-	TSS, YPL111W (339897)	339735, 339899	339753, 339825/339899	339735, 339899	339825/339899	Not remodeled in WT, remodeled away from TSS by Chd1-Ume6	0	2
191	chrXVI	520308	-	TSS, YPL017C (520213)	520131, 520365	520131/520247, 520365	520177, 520365	520177/520247, 520365	Remodeled toward TSS in WT, remodeled toward TSS by Chd1-Ume6	1	1
192	chrXVI	527136	+	TSS, YPL015C (526925)	527115	527115	527115	527115	no remodeling, nucleosome on site	0	0
193	chrXVI	571559	-	TSS, YPR007C (571525)	571459, 571650	571526, 571650	571476, 571630	571526, 571650	Remodeled toward TSS in WT, remodeled toward TSS by Chd1-Ume6	1	1
194	chrXVI	599681	+	TTS, YPR019W (599656)	599571	599571/599625	599580	599625	Remodeled toward TTS in WT, remodeled toward TTS by Chd1-Ume6	(-)	(-)
195	chrXVI	621644	-	TSS, YPR027C (621439)	621644 (diffuse)	621644 (diffuse)	621559, 621723	621644 (diffuse)	Remodeled toward TSS in WT, not remodeled by Chd1-Ume6	1	0
196	chrXVI	627497	+	TSS, YPR029C (627015), TSS, YPR030W (627872)	627396, 627552	627446, 627552	627424, 627552	627446, 627552	Remodeled toward, away from TSS in WT, remodeled toward/away from TSS by Chd10Ume6	1,2	1,2
197	chrXVI	640993	+	TTS, YPR034W (641205)	640924, 641073	640881, 641058	640924, 641073	640881, 641058	not remodeled in WT, remodeled away from TTS by Chd1-Ume6	(-)	(-)
198	chrXVI	678802	-	TSS, YPR064W (678545)	678714, 678852	678759, 678852	678714, 678852	678759, 678852	Not remodeled in WT, remodeled away from TSS by Chd1-Ume6	0	2
199	chrXVI	770840	-	no feature	770708	770733	770796	770796	Remodeled in WT, remodeled by Chd1-Ume6, no feature	(-)	(-)
200	chrXVI	870210	+	TSS, YPR263C (870047)	870313	870264/870313	870293	870264	Remodeled toward TSS in WT, remodeled toward TSS by Chd1-Ume6	1	1
201	chrXVI	882845	-	TTS, YPR170C (883793)	882811, 882979	882811, 882979	882811, 882979	882811, 882979	no remodeling in WT, no remodeling by Chd1-Ume6	(-)	(-)
202	chrXVI	927031	-	TSS, YPR194C (927185)	926987, 927150	926987, 927150	926987, 927150	926987, 927150	no remodeling in WT, no remodeling by Chd1-Ume6	0	0
